# Heterotrimeric G-Protein, $G_{\alpha 16}$ , Is a Critical Downstream Effector of Non-Canonical Wnt Signaling and a Potent Inhibitor of Transformed Cell Growth in Non Small Cell Lung Cancer

Sreedevi Avasarala<sup>1</sup>, Rama Kamesh Bikkavilli<sup>1</sup>, Michelle Van Scoyk<sup>1</sup>, Wei Zhang<sup>2</sup>, Ajibike Lapite<sup>1</sup>, Logan Hostetter<sup>1</sup>, Joshua T. Byers<sup>1</sup>, Lynn E. Heasley<sup>3</sup>, Jang Won Sohn<sup>4</sup>, Robert A. Winn<sup>1,5\*</sup>

**1** Department of Pulmonary, Critical Care, Sleep and Allergy, College of Medicine, University of Illinois at Chicago, Chicago, Illinois, United States of America, **2** Department of Pediatrics, College of Medicine, University of Illinois at Chicago, Chicago, Illinois, United States of America, **3** Department of Craniofacial Biology, Anschutz Medical Campus, University of Colorado, Denver, Colorado, United States of America, **4** Department of Internal Medicine, School of Medicine, Hanyang University, Seoul, South Korea, **5** Jesse Brown Veterans Affairs Medical Center, Chicago, Illinois, United States of America

## Abstract

G-protein-coupled receptors (GPCR) are the largest family of cell surface molecules that play important role/s in a number of biological and pathological processes including cancers. Earlier studies have highlighted the importance of Wnt7a signaling via its cognate receptor Frizzled9, a GPCR, in inhibition of cell proliferation, anchorage-independent growth, and reversal of transformed phenotype in non small cell lung cancer primarily through activation of the tumor suppressor, PPAR $\gamma$ . However, the G-protein effectors that couple to this important tumor suppressor pathway have not been identified, and are of potential therapeutic interest. In this study, by using two independent Wnt7a/Frizzled9-specific read-outs, we identify  $G_{\alpha 16}$  as a novel downstream effector of Wnt7a/Frizzled9 signaling. Interestingly,  $G_{\alpha 16}$  expression is severely down-regulated, both at the messenger RNA levels and protein levels, in many non small cell lung cancer cell lines. Additionally, through gene-specific knock-downs and expression of GTPase-deficient forms (Q212L) of  $G_{\alpha 16}$ , we also establish  $G_{\alpha 16}$  as a novel regulator of non small cell lung cancer cell proliferation and anchorage-independent cell growth. Taken together, our data not only establish the importance of  $G_{\alpha 16}$  as a critical downstream effector of the non-canonical Wnt signaling pathway but also as a potential therapeutic target for the treatment of non small cell lung cancer.

**Citation:** Avasarala S, Bikkavilli RK, Van Scoyk M, Zhang W, Lapite A, et al. (2013) Heterotrimeric G-Protein,  $G_{\alpha 16}$ , Is a Critical Downstream Effector of Non-Canonical Wnt Signaling and a Potent Inhibitor of Transformed Cell Growth in Non Small Cell Lung Cancer. PLoS ONE 8(10): e76895. doi:10.1371/journal.pone.0076895

**Editor:** Sumitra Deb, Virginia Commonwealth University, United States of America

**Received:** May 29, 2013; **Accepted:** August 28, 2013; **Published:** October 18, 2013

This is an open-access article, free of all copyright, and may be freely reproduced, distributed, transmitted, modified, built upon, or otherwise used by anyone for any lawful purpose. The work is made available under the Creative Commons CC0 public domain dedication.

**Funding:** This study was supported by a Merit Award from the U.S. Department of Veterans Affairs, National Institutes of Health (NIH) grants R01CA1385282522717 and 5R21CA153268-02 to RAW. The funders had no role in study design, data collection and analysis, decision to publish, or preparation of the manuscript.

**Competing Interests:** Co-author, Dr. Robert Winn is a PLOS ONE Editorial Board member. This does not alter the authors' adherence to all the PLOS ONE policies on sharing data and materials. The authors declare that no competing interests exist.

\* E-mail: rwinn@uic.edu

## Introduction

Wnts are secreted glycoproteins, which transduce key signal transduction events that play critical roles not only during mammalian development but also in many human diseases [1]. Wnts bind to the Frizzled receptors (Fzds), and activate either a canonical or  $\beta$ -catenin dependent pathway or non-canonical or  $\beta$ -catenin independent pathways via c-Jun N-terminal kinase (JNK), p38 mitogen activated protein kinase (MAPK) pathway or peroxisome proliferator-activated receptor  $\gamma$  pathways (PPAR $\gamma$ ) [2–7]. Aberrant activation of Wnt signaling has been implicated in many diseases including cancer [1,8]. We have previously identified that Wnt7a is lost in non-small cell lung cancers (NSCLC) [5,6], and restoration of Wnt7a signaling in NSCLC cell lines leads to reversal of transformed phenotype [6], unveiling Wnt7a signaling as a novel tumor suppressive pathway in lung cancer. However, the mechanism of Wnt7a signal transduction

from the plasma membrane to the cytoplasm and nucleus remains largely unknown.

The superfamily of G-protein-coupled receptors (GPCRs) is the largest known family of proteins in the mammalian genome [9] and their dysfunction is associated with a number of prevalent human diseases. In fact, emerging experimental and clinical data indicate that GPCRs have a critical role not only in cancer progression and metastasis, but also in many other human diseases, making GPCRs the largest targets for current therapeutic agents [10]. It has previously been shown that GPCRs are associated with autocrine growth in Small Cell Lung Cancer (SCLC, [11,12]). Frizzleds are rightly included in the G-protein-coupled receptor (GPCR) superfamily as they display seven transmembrane domain structure, sensitivity to pertussis toxin and modulation of intracellular calcium. Interestingly, there are ten different Fzds cloned thus far. Although, all the Fzd receptors display similar heptahelical structure, it remains elusive how these receptors signal to different downstream effectors. Another

cardinal property of GPCRs is that they signal via heterotrimeric G-proteins [13–19], implying that heterotrimeric G-proteins might modulate the effects of Fzds.

We have previously shown that restoration of Wnt7a/Fzd9 signaling inhibited both cell proliferation and anchorage-independent growth, promoted cellular differentiation, and reversed the transformed phenotype in NSCLC cells via the activation of PPAR $\gamma$  and stimulation of E-cadherin proteins [5,20]. However, the G-protein/s mediating the anti-tumorigenic role of Wnt7a/Fzd9 signaling remains unknown. In this study, we utilized Wnt7a-stimulated PPAR $\gamma$  and E-cadherin activation as readouts and identify the heterotrimeric G-protein, G<sub>α16</sub>, as an important downstream effector of Wnt7a/Fzd9 signaling. Interestingly, we also observe reduced expression of G<sub>α16</sub>; both at the transcript level and at the protein level, in many NSCLC cell lines. Additionally, using gene specific knock downs and expression of constitutively active mutants of G-proteins, we also demonstrate that G<sub>α16</sub> is critical for Wnt7a/Fzd9-mediated inhibition of transformed growth in NSCLC. Furthermore, we also establish G<sub>α16</sub> as a novel mediator of Wnt7a/Fzd9-mediated activation of ERK5 and nuclear receptor tumor suppressor PPAR $\gamma$ . Taken together, G<sub>α16</sub> is shown here to be a novel regulator of NSCLC cell proliferation and anchorage-independent cell growth.

## Results

### Identification of Heterotrimeric G-proteins Regulating Wnt7a/Fzd9 Signaling

To evaluate the possible involvement of G-protein/s in Wnt7a/Fzd9 signaling, we made use of constitutively active G $\alpha$  subunits of G-proteins that are deficient in GTPase activity, and probed their effects on two well established Wnt7a/Fzd9-dependent read-outs *viz.*, PPAR-dependent gene transcription and E-cadherin-dependent gene transcription in NSCLC cell lines [5,20]. NSCLC cell lines (H157 and H2122) were transiently transfected with either an empty vector or a panel of constitutively active G $\alpha$  subunits of G-proteins (G<sub>αi2</sub>Q205L, G<sub>αo</sub>Q205L, G<sub>αq</sub>Q209L, G<sub>αz</sub>Q205L, G<sub>α12</sub>Q229L, or G<sub>α16</sub>Q212L) together with a PPAR-Response Element (RE) luciferase reporter vector. The effects of the expression of constitutively active G-proteins on PPAR-dependent gene transcription were later determined by measuring luminescence in the cell lysates (Fig. 1A, B). Interestingly, expression of G<sub>α16</sub>Q212L, but not G<sub>αi2</sub>Q205L, G<sub>αo</sub>Q205L, G<sub>αz</sub>Q205L, or G<sub>α12</sub>Q229L, resulted in a four-fold increase in PPAR-RE luciferase activity in both the cell lines tested, an effect similar to that of Wnt7a/Fzd9-stimulated PPAR-RE luciferase activity alone (Fig. 1A, B). For the positive controls, since, H157 and H2122 cells have reduced or no Wnt7a expression, the cells were transfected with Wnt7a expression plasmids [5,20]. H157 cells were additionally transfected with Fzd9 plasmid, as they do not express endogenous Fzd9 [5,20]. It was also interesting to note that expression of G<sub>αq</sub>Q209L also induced PPAR-RE-luciferase activity, *albeit* less efficiently than G<sub>α16</sub>Q212L (Fig. 1A, B). The effects of either G<sub>α16</sub>Q212L or G<sub>αq</sub>Q209L expression were specific to PPAR $\gamma$  activity but not to PPAR $\delta$  activity, since, the expression of G<sub>α16</sub>Q212L, G<sub>αq</sub>Q209L, or Wnt7a/Fzd9 in H157 and H2122 failed to stimulate PPAR $\delta$ -RE luciferase activity, a specific reporter for PPAR $\delta$  (data not shown). Since, Wnt7a/Fzd9 signaling failed to stimulate PPAR $\alpha$  activity (data not shown), we therefore did not attempt to test the effects of G<sub>α16</sub>Q212L, G<sub>αq</sub>Q209L on PPAR $\alpha$  activation.

E-cadherin is a well-known marker of epithelial differentiation [21,22] and has previously been shown to be an important downstream target for both Wnt7a/Fzd9 signaling and PPAR $\gamma$

expression in NSCLC [6,23]. We therefore also evaluated the effects of constitutively active G-proteins on E-cadherin promoter activity in NSCLC cells (H157 and H2122). Similar to the effects on PPAR $\gamma$  activity, expression of G<sub>α16</sub>Q212L induced a robust increase in E-cadherin promoter activity in both the cell lines tested when compared to empty vector controls (Fig. 1C, D). The effects of G<sub>αq</sub>Q209L expression on E-cadherin promoter activity, although significant, were less potent than that of G<sub>α16</sub>Q212L expression (Fig. 1C, D). Taken together, these results suggest a strong association of the G-proteins, G<sub>α16</sub> and G<sub>αq</sub>, with activation of PPAR $\gamma$  and increased cellular differentiation as shown by increased E-cadherin expression.

### G<sub>α16</sub> Expression is Lost in NSCLC

We have identified G<sub>α16</sub> and G<sub>αq</sub> as important mediators of PPAR $\gamma$  and E-cadherin expression in NSCLC cell lines (Fig. 1). It was interesting to note that both G<sub>α16</sub> and G<sub>αq</sub> belong to the Gq family of G-proteins. However, since G<sub>αq</sub>Q209L expression not only showed less potent effects on PPAR $\gamma$  activity and E-cadherin expression but also had poor and inconsistent effects on NSCLC proliferation and anchorage-independent cell growth (data not shown), we focused on evaluating the role of G<sub>α16</sub>, but not G<sub>αq</sub>. In order to establish a potential role for G<sub>α16</sub> in NSCLC, we first probed the expression levels of G<sub>α16</sub> in a panel of NSCLC cell lines using quantitative RT-PCR (qPCR, Fig. 2A). For these experiments, total RNA was extracted from non-transformed lung bronchial epithelial cells (Beas2B), lung adenocarcinoma (A549, H2122), squamous cell carcinoma (H157) and large cell carcinoma cell lines (H661 and H1299), reverse transcribed and the cDNAs were later used to measure the levels of G<sub>α16</sub> expression (Fig. 2A). Interestingly, G<sub>α16</sub> expression was severely attenuated in all the NSCLC cell lines tested in comparison to non-transformed bronchial epithelial cell line (Beas2B, Fig. 2A). We also determined the protein levels of G<sub>α16</sub> in the non-transformed lung bronchial epithelial cells (Beas2B) and NSCLC cell lines by using an antibody specific to G<sub>α16</sub> (Fig. 2B). Western blotting of NSCLC cell lysates revealed a complete loss in expression of G<sub>α16</sub> (Fig. 2B). Although there is no detectable mRNA expression, H157 cells displayed some G<sub>α16</sub> protein expression. Only a speculation, the detectable expression of G<sub>α16</sub> in H157 might be due to low protein turnover. On the contrary, NSCLC cell lines and Beas2B expressed similar levels of G<sub>αo</sub> (Fig. 2B), the G-protein that is specific to  $\beta$ -catenin dependent signaling pathway [2,24]. Since, loss of heterozygosity (LOH) plays an important role during the inactivation of tumor suppressor genes (TSG), we also searched for LOH (segmented genotype intensity) at GNA15/16 locus (G<sub>α16</sub>) on our lung cancer cell lines using the CONAN (Copy Number Analysis) tool (<http://www.sanger.ac.uk/cgi-bin/genetics/CGP/conan/>) from the Sanger Cancer Genome Project. We could detect LOH in H157, A549, H2122 and H661. In addition, we also searched for somatic copy number variations (CNV) at GNA15/16 locus in human lung cancers. For this purpose, the CNV data in 493 lung adenocarcinoma and 416 lung squamous cell carcinoma patients were downloaded from The Cancer Genome Atlas (TCGA) (<http://cancergenome.nih.gov/>) Project. Gene-level copy number estimates were later processed using GISTIC2 [25] and the TCGA FIREHOSE pipeline. Strikingly, the mutation status of GNA15/16 locus was 1.22% for homozygous deletions and 53.14% for single copy deletions in human lung adenocarcinoma patients and 0.96% for homozygous deletions and 41.34% for single copy deletions in human lung squamous carcinoma patients. These data provide further evidence for the loss of G<sub>α16</sub> in lung cancers.

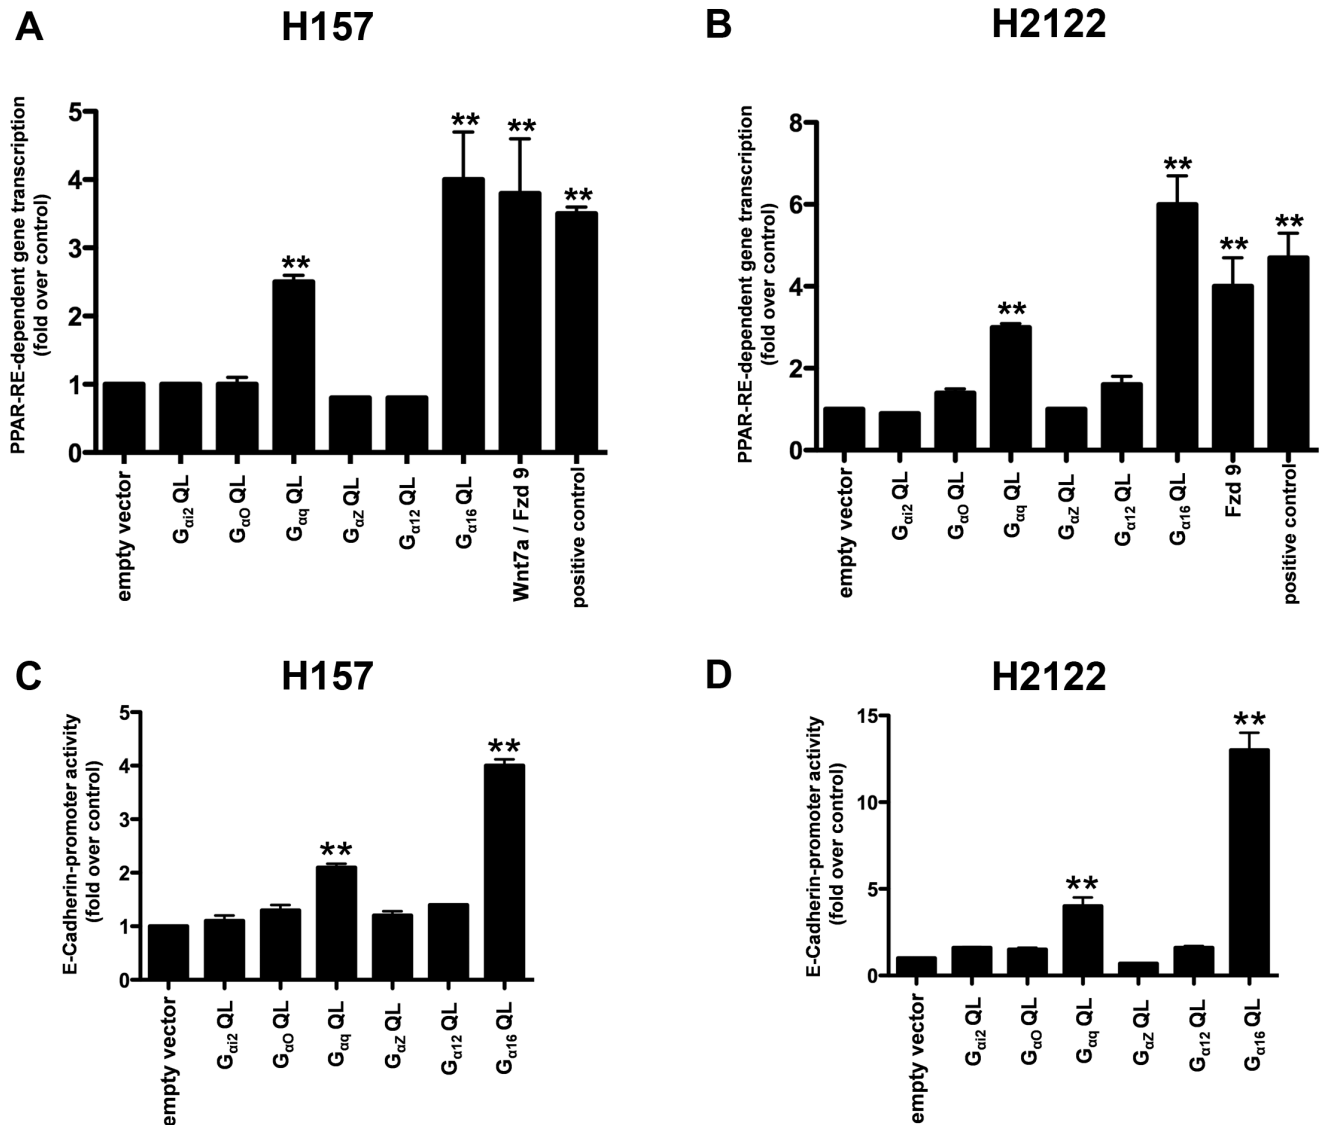

**Figure 1. Identification of  $G_{\alpha 16}$  as a novel downstream regulator of Wnt7a/Fzd9 signaling.** Effects of constitutively active  $G_{\alpha}$  subunits on Wnt7a/Fzd9-dependent read-outs. NSCLC cell lines, H157 (A) or H2122 (B) were transfected either with empty vector, or constitutively active  $G_{\alpha}$  subunits of G-proteins together with PPAR-RE-luciferase reporter and CMV- $\beta$ -galactosidase reporter vectors. After 48 h, the cells were lysed and luciferase activities were measured as described in the Methods. NSCLC cell lines, H157 (C) or H2122 (D) were transfected either with empty vector, or constitutively active  $G_{\alpha}$  subunits of G-proteins together with E-cadherin promoter-luciferase-reporter and CMV- $\beta$ -galactosidase reporter vectors. After 48 h, the cells were lysed and luciferase activities were measured as described in the Methods. Luciferase values were normalized to CMV- $\beta$ -galactosidase values and were represented in the graph. Constitutively active  $G_{\alpha}$  subunit-induced PPRE-dependent gene transcription or E-cadherin promoter activity were represented as the fold change over the empty vector control. Data represents mean  $\pm$  SEM of three separate experiments. \*\*,  $p < 0.01$ ; versus empty vector control. doi:10.1371/journal.pone.0076895.g001

### Role of $G_{\alpha 16}$ in NSCLC Cell Proliferation and Anchorage-independent Cell Growth

Previous studies have established an important role for PPAR $\gamma$  in NSCLC cell proliferation, transformed growth, metastasis, and epithelial differentiation [23,26]. Similarly, we also established the importance of Wnt7a/Fzd9 signaling in reduced transformed growth and increased cellular differentiation in NSCLC via the induction of PPAR $\gamma$  [5,20]. If  $G_{\alpha 16}$  is an important mediator of Wnt7a/Fzd9 signaling, we reason that  $G_{\alpha 16}$  might also potentially mediate the transformed cell growth in NSCLC. In order to interrogate the specific involvement of  $G_{\alpha 16}$  in NSCLC cell proliferation and transformed cell growth, we utilized two

approaches: (1) the effects of small interference RNAs (siRNAs) specific to  $G_{\alpha 16}$  and (2) expression of a constitutively active  $G_{\alpha 16}$ Q212L. Small interference RNAs (siRNAs) specifically targeting either  $G_{\alpha 16}$  or  $G_{\alpha 10}$  were designed, tested for their specificity, and then employed to selectively suppress  $G_{\alpha 16}$  or  $G_{\alpha 10}$  in Beas2B cells. The siRNA reagents specifically suppressed either  $G_{\alpha 16}$  or  $G_{\alpha 10}$ , achieving a 70% or more reduction in the expression of each protein (Fig. 3A). Scrambled siRNAs designed by the commercial supplier were tested as controls in some subsets; they showed no capacity to suppress either  $G_{\alpha 16}$  or  $G_{\alpha 10}$  expression (Fig. 3A). Treatment of non-transformed bronchial epithelial cells (Beas2B, with  $G_{\alpha 16}$  expression) with  $G_{\alpha 16}$ -specific siRNAs significantly increased the cell proliferation as determined by

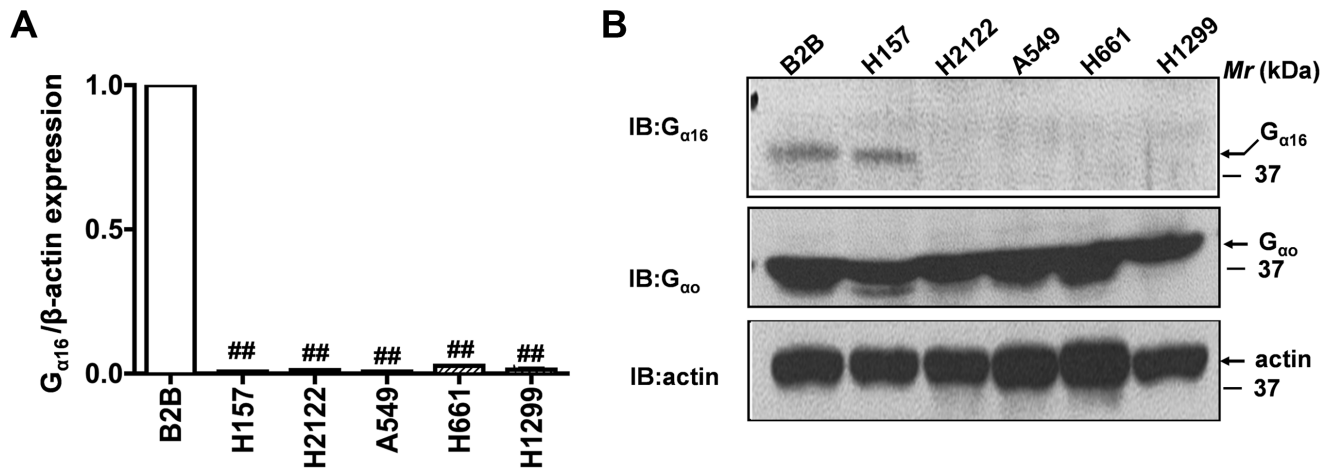

**Figure 2.  $G_{\alpha 16}$  expression is lost in NSCLC.** A, Real-time PCR analyses of the expression of  $G_{\alpha 16}$  in non-transformed and NSCLC cell lines. Total RNA was extracted from a non-transformed cell line (Beas2B) or NSCLC cell lines (H157, H2122, A549, H661 and H1299) and  $G_{\alpha 16}$  expression was quantified using the sense: caccacgtagcctgctgcatg and anti-sense: gcgcctcttctgctgcctcggg primers.  $\beta$ -actin was used as an internal control for normalization. Data represents mean  $\pm$  SEM of three separate experiments performed in duplicates. #,  $p < 0.01$ ; versus control (Beas2B). B, Western blot analysis of  $G_{\alpha 16}$  expression in non-transformed and NSCLC cell lines. Equal amounts of total cell lysates of a non-transformed cell line (Beas2B) or NSCLC cell lines (H157, H2122, A549, H661 and H1299) were separated on a SDS-PAGE gels, transferred onto nitrocellulose blots and the “blots” were later probed with either anti- $G_{\alpha 16}$ , anti- $G_{\alpha o}$  or anti- $\beta$ -actin antibodies. doi:10.1371/journal.pone.0076895.g002

clonogenic (Fig. 3B) and MTS cell proliferation assays (Fig. 3C). While, treatment of Beas2B cells with  $G_{\alpha o}$ -specific siRNAs, a G-protein that is specific for  $\beta$ -catenin-dependent signaling pathway [2,24], had no or modest effect on cell proliferation rates, in comparison to control siRNA treated cells, as determined by clonogenic (Fig. 3B) and MTS cell proliferation assays (Fig. 3C), indicating a specific association of  $G_{\alpha 16}$  and NSCLC cell proliferation. If our hypothesis that  $G_{\alpha 16}$  mediates NSCLC cell proliferation were true, then expression of a constitutively active, GTPase deficient (Q212L) mutant of  $G_{\alpha 16}$  in NSCLC cells should result in reduced cell proliferation, even in the absence of Wnt7a. Indeed, transient expression of  $G_{\alpha 16}$ Q212L, but not  $G_{\alpha o}$ Q205L, in H2122 cells resulted in reduced cell proliferation as determined by clonogenic (Fig. 3D), MTS cell proliferation assays (Fig. 3E), and/or 5-day cell growth curve analysis (Fig. 3F). In addition, stable expression of  $G_{\alpha 16}$ Q212L in H2122 cells also inhibited the abilities of H2122 cells to grow on soft agar, an *in vitro* measure of cellular transformation (Fig. 3G). Thus, by using several distinct and powerful assays, we show that  $G_{\alpha 16}$  but not  $G_{\alpha o}$  regulates NSCLC cell proliferation and transformed cell growth.

#### Wnt7a-stimulated ERK5 Activation is $G_{\alpha 16}$ Dependent

We previously observed that expression of Wnt7a/Fzd9 in NSCLC cells results in robust activation of ERK5 [5]. We next tested if recombinant hWnt7a stimulation of Beas2B cells is also capable of activating ERK5; by immunoblotting SDS-PAGE gel blots with antibodies specific for phospho-ERK5 (Fig. 4A). Stimulation of Beas2B cultures with rWnt7a resulted in a rapid activation of ERK5 reaching a peak within 15 min of treatment (Fig. 4A). To ascertain if Wnt7a/ERK5 signaling was operating via  $G_{\alpha 16}$ , we made use of  $G_{\alpha 16}$ -specific siRNAs (Fig. 4B). In these studies, Beas2B cells were co-transfected with  $G_{\alpha 16}$ -specific siRNAs either with or without Wnt7a expression vectors (Fig. 4B). Interestingly, treatment with  $G_{\alpha 16}$ -specific siRNAs abolished the ability of Wnt7a to stimulate ERK5 activation (Fig. 4B). If depletion of  $G_{\alpha 16}$  could block Wnt7a-mediated activation of ERK5, then expression of constitutively active form of  $G_{\alpha 16}$  (Q212L) should induce ERK5 activation. In order to test

this hypothesis, we made use of a MEF2-C-dependent luciferase reporter construct [27]. This reporter measures the ERK5 kinase activity, as it is obligate for activating MEF2-C-dependent gene transcription [27]. Transient expression of constitutively active form of  $G_{\alpha 16}$ Q212L along with MEF2-C-luciferase reporter plasmids resulted in a robust increase in luciferase activities as determined in both H157 (Fig. 4C) and H2122 (Fig. 4D) NSCLC cell lines. Furthermore, the  $G_{\alpha 16}$ Q212L-induced MEF2-C-dependent luciferase activities were sensitive to the treatment of PD98059, which inhibits MEK 1, 2, and 5 (Fig. 4C, D), but not by the MEK1/2 inhibitor U0126 (data not shown), indicating the specificity of our assay. Taken together, these data clearly establish that  $G_{\alpha 16}$  function is critical for Wnt7a-mediated ERK5 activation.

#### $G_{\alpha 16}$ Regulates Wnt7a-stimulated PPAR $\gamma$ Activation

We next interrogated if depletion of  $G_{\alpha 16}$  also blocks the far downstream signaling effector of Wnt7a/Fzd9 signaling *viz.*, PPAR $\gamma$  [5]. H157 and H2122 cells were co-transfected with  $G_{\alpha 16}$ -specific siRNAs either with or without Wnt7a expression vectors and PPAR-RE luciferase reporter vector (Fig. 5A, B). Depletion of  $G_{\alpha 16}$ , but not  $G_{\alpha o}$ , selectively blocked Wnt7a-stimulated PPAR $\gamma$  activation in both the cell lines tested (Fig. 5A, B). Consistent to the effects of  $G_{\alpha 16}$  depletion on Wnt7a-stimulated PPAR $\gamma$  activation, expression of constitutively active  $G_{\alpha 16}$ Q212L, but not  $G_{\alpha o}$ Q205L, in H157 or H2122 cell lines induced a robust increase in PPAR $\gamma$  activity (Fig. 5C, D). Furthermore,  $G_{\alpha 16}$ Q212L-induced anti-proliferative effects on H2122 cell growth were abrogated by intoxication of the transfected cells with PPAR $\gamma$  inhibitor (T007090) in both H157 (Fig. 5E) and H2122 cell lines (Fig. 5F). These data strongly suggest that the anti-proliferative effects of  $G_{\alpha 16}$  in NSCLC are mediated via ERK5 (Fig. 4) and PPAR $\gamma$  (Fig. 5).

#### Novel Role for ROR1/2 in Wnt7a/Fzd9 Signaling

It is well established that activation of Wnt/ $\beta$ -catenin-dependent signaling requires co-receptors low-density lipoproteins (LRP5/6) and the G-protein,  $G_{\alpha o}$  [24,28–30]. Since, we have

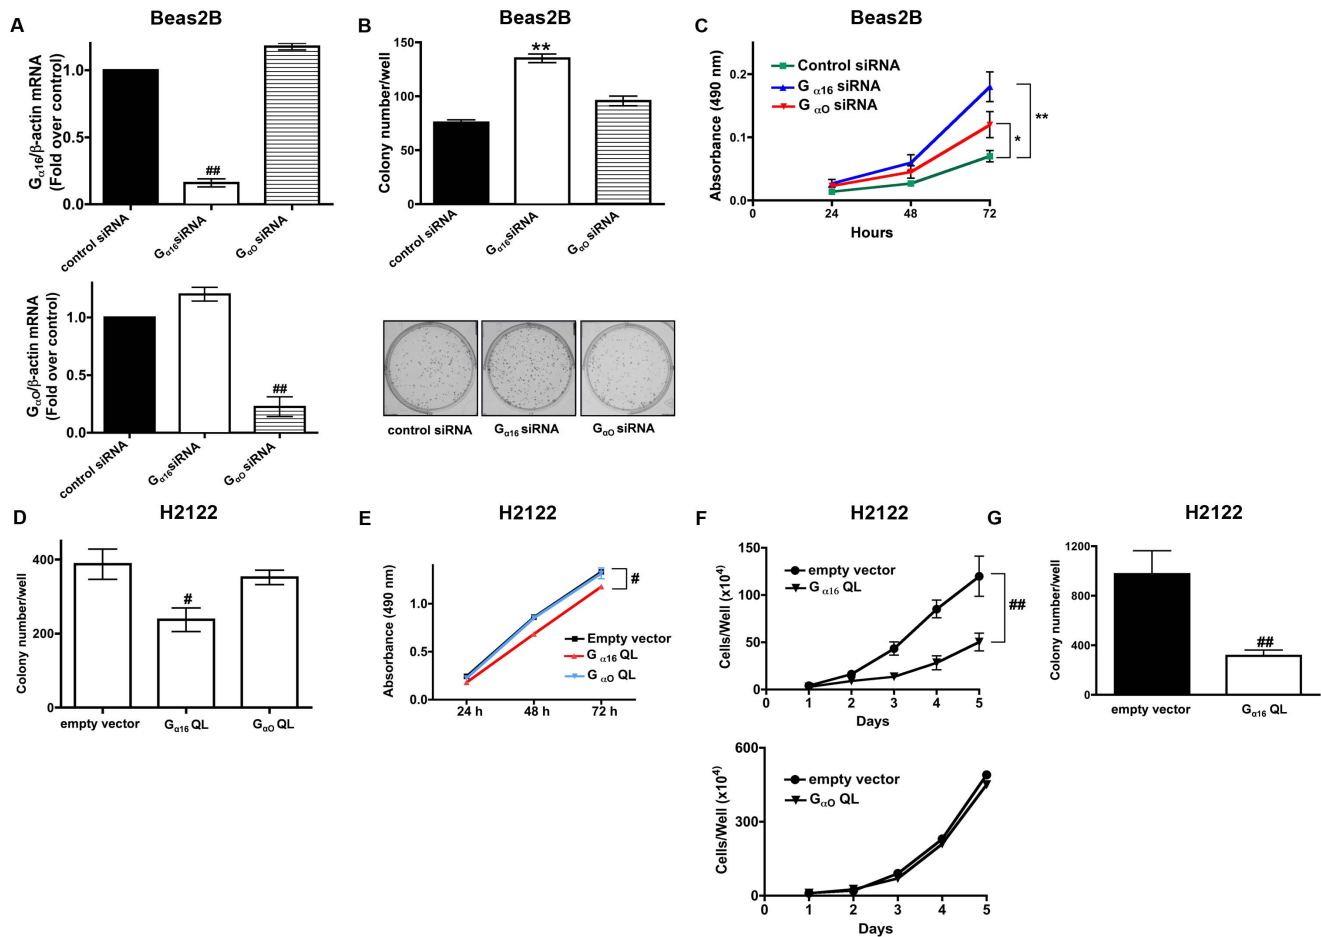

**Figure 3.  $G_{\alpha 16}$  regulates NSCLC cell proliferation.** A. Beas2B cells were transfected with either control siRNA or siRNAs specific to  $G_{\alpha 16}$  or  $G_{\alpha 20}$ . Total RNA was isolated and analyzed for the expression of  $G_{\alpha 16}$  or  $G_{\alpha 20}$  using quantitative PCR. Normalized  $G_{\alpha 16}$  or  $G_{\alpha 20}$  mRNA levels to that of  $\beta$ -actin mRNA were represented in the graphs. ##,  $p < 0.01$ ; versus control siRNA. Beas2B cells were transfected with either control siRNA or siRNAs-specific to  $G_{\alpha 16}$  or  $G_{\alpha 20}$  and cell proliferation rates were later determined either by using a clonogenic assay (B) or an MTS assay (C) as described in the Methods. Upper panel represents mean  $\pm$  SEM from two independent highly reproducible experiments, while representative images were displayed in the lower panel. Data represents mean  $\pm$  SEM from three independent highly reproducible experiments. \*,  $p < 0.05$ ; \*\*,  $p < 0.01$ ; versus control siRNA. H2122 cells were transfected either with empty vector or constitutively active  $G_{\alpha 16}$ Q212L or  $G_{\alpha 20}$ Q205L expression vectors and the cell proliferation rates were later determined using either a clonogenic assay (D), an MTS assay (E) or five-day cell growth curve analysis (F) as described in the Methods. Upper panel represents mean  $\pm$  SEM from two independent highly reproducible experiments, while representative images were displayed in the lower panel. Data represents mean  $\pm$  SEM from three independent highly reproducible experiments. #,  $p < 0.05$ ; G, H2122 cells were transfected with either empty vector or constitutively active  $G_{\alpha 16}$  Q212L and the abilities of the transfected cells to grow on soft agar were later probed. Data represents mean  $\pm$  SEM from three independent highly reproducible experiments. ##,  $p < 0.01$ ; versus empty vector control. doi:10.1371/journal.pone.0076895.g003

established  $G_{\alpha 16}$  as a critical mediator of Wnt7a/Fzd9 signaling (Fig. 1, 2, 3,4), we next evaluated for the role of co-receptors, if at all, in mediating Wnt7a/Fzd9 signaling. For these studies, H157 and H1299 cells were transfected with either empty vector or Wnt7a and Fzd9 expression plasmids. Interestingly, probing the cell lysates expressing Wnt7a/Fzd9 revealed a robust increase in the expression of tyrosine-protein kinase orphan receptors, ROR1/2 (Fig. 6A). While, the co-receptors cardinal to Wnt/ $\beta$ -catenin-dependent signaling pathway, LRP6 or its activated form (phospho-LRP6-S1490) is unaffected (Fig. 6A). In strong support of our findings, Wnt7a/Fzd9 signaling also failed to stimulate TOPFLASH activity, a Wnt/ $\beta$ -catenin-specific read-out (Fig. 6B). While, under similar conditions, Wnt7a/Fzd9 stimulated a robust increase in PPAR-RE-dependent gene transcription, as expected (Fig. 6C). In total, these data suggest that the Wnt7a/Fzd9 signaling pathway, unlike that of  $\beta$ -catenin-dependent signaling

mechanism, might signal via the G-protein,  $G_{\alpha 16}$  and the co-receptors, ROR1/2.

## Discussion

Wnt7a has been previously shown to be essential for the normal epithelium formation and for maintaining a normal epithelial phenotype in the lung [31]. Moreover, Wnt7a expression is frequently lost in NSCLC [32]. We have previously shown that re-expression of Wnt7a reversed cellular transformation, decreased anchorage-independent growth, and induced epithelial differentiation in NSCLC cells through its cognate receptor Fzd9 [5,20]. This effect is mediated, at least in part, through ERK5-dependent activation of PPAR $\gamma$  [5]. Importantly, Wnt7a/Fzd9 does not activate the canonical Wnt/ $\beta$ -catenin signaling pathway. Frizzleds, members of the GPCR superfamily [33], display many of the landmarks observed in virtually all GPCRs, including the

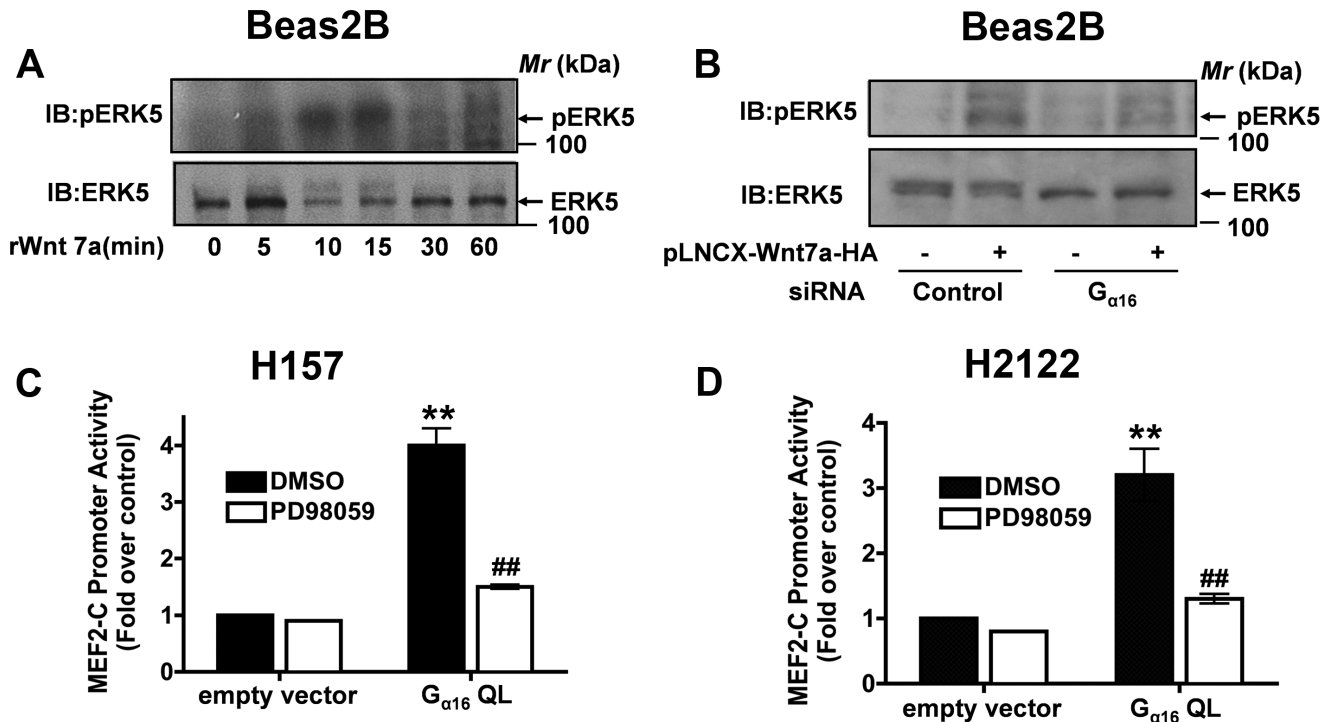

**Figure 4.  $G_{\alpha 16}$  regulates Wnt7a/Fzd9-mediated ERK5 activation.** A, Beas2B cells were serum starved for 2 h and were later stimulated with recombinant Wnt7a. After stimulation for indicated periods of time, the cells were lysed, separated on SDS-PAGE gels and later probed for ERK5 activation by probing the nitrocellulose blots with anti-pERK5 antibodies and normalized for equal loading by probing with anti-ERK5 antibodies. B, Beas2B cells were transfected either with control siRNA or  $G_{\alpha 16}$ -specific siRNAs together with or without Wnt7a expression vector. After 48 h, the cells were lysed and analyzed for ERK5 activation by probing the blots with anti-pERK5 and ERK5 antibodies. NSCLC cell lines, H157 (C) or H2122 (D) cells were transfected either with empty vector or  $G_{\alpha 16}$ Q212L together with MEF2-C-dependent luciferase reporter, followed by a treatment either without or with MEK inhibitor PD98059 (20  $\mu$ M). After 24 h, the lysates were assayed for luciferase activities as described in the Methods. Data represents mean  $\pm$  SEM of three separate experiments. \*\*,  $p < 0.01$ ; versus empty vector control. ##,  $p < 0.01$ ; versus  $G_{\alpha 16}$  Q212L. doi:10.1371/journal.pone.0076895.g004

presence of seven hydrophobic transmembrane segments predicted to form alpha-helices, and three intracellular loops as well as a cytoplasmic tail [33,34]. Of note, Fzds are also reported as being closely associated with the adaptor molecules, like that of  $\beta$ -arrestins, a well-known adaptor protein involved in the GPCR desensitization [35] and regulators of G-protein signaling (RGS, [36]).

G-proteins are cardinal to GPCR signaling and have been shown to be involved in canonical Wnt/ $\beta$ -catenin signaling, non-canonical Wnt/ $Ca^{2+}$ /cGMP pathway and planar cell polarity pathways [34]. Thus far,  $G_{\alpha o}$  and  $G_{\alpha q}$  were shown to be critical during mammalian development, and teratocarcinoma stem cell differentiation in response to oncogenic Fzd1 stimulation [24]. However, the tumor protective roles for G-proteins, if any, have not been identified. In the present study, we have identified  $G_{\alpha q}$  family of G-proteins as novel downstream mediators of Wnt7a/Fzd9-mediated activation of ERK5 and the tumor suppressor gene PPAR $\gamma$ . For the first time, we show that  $G_{\alpha q}$  family members, specifically,  $G_{\alpha 16}$ , can activate a novel non-canonical Wnt signaling. The signaling cascade downstream of  $G_{\alpha}$  proteins involves diverse and complex kinases that ultimately lead to regulated gene transcription and changes in cell physiology. Each  $G_{\alpha q}$  family member has been implicated in regulating one or more of the mitogen-activated protein kinase (MAPK) pathways in cell cultures, although the precise mechanism/s of signaling remains unclear. In the present study, we also show that  $G_{\alpha 16}$  is the downstream effector of Wnt7a/Fzd9 signaling that leads to the activation of ERK5. Interestingly, other studies have shown that

GPCRs also can stimulate ERK5 through mechanisms that involve  $G_{\alpha q}$  and  $G_{\alpha 12/13}$ , independently of Rho, Rac1 and Cdc42 [37]. However, we did not see any activation of PPAR $\gamma$  by  $G_{\alpha 12}$  expression (Fig. 1). Thus far,  $G_{\alpha q}$ -mediated MAPK signaling is restricted to the activation of JNK1/2 or ERK1/2, but not ERK5. In the present study, we also show that a member of  $G_{\alpha q}$  family,  $G_{\alpha 16}$ , as a novel regulator of ERK5. It is well known that the  $G_{\alpha q}$  family ( $G_{\alpha q}$ ,  $G_{\alpha 11}$ ,  $G_{\alpha 14}$ ,  $G_{\alpha 15/16}$ ), upon activation, binds and stimulates PLC- $\beta$ -mediated inositol phosphate signaling cascade, which leads to calcium mobilization and PKC $\alpha$  activation via phospholipid phosphatidylinositol biphosphonate (PIP2), inositol triphosphate (IP3) and diacyl glycerol (DAG, [38]). In the same lines, Wnt7a/Fzd9 signaling also stimulated PLC $\beta$  and PKC (data not shown). Interestingly, PKC $\alpha$  has been shown to be associated with reduced cancer cell growth via inhibition of S-phase and up regulation of p21 [39]. Moreover, interaction between PKC and ERK5 have been suggested by Li *et al.*, demonstrating that typical PKC regulate cytokines through MEKK2/ERK5-dependent and independent pathways [40]. Furthermore, atypical PKCs have also been shown to activate MEK5/ERK5 [40,41]. However, in the current study we did not investigate the association between PKC and ERK5. Thus, further evaluations are necessary to reveal the precise mechanism/s of anti-tumorigenic effect of the  $G_{\alpha q}$  family in NSCLC cells.

In the present study we identify  $G_{\alpha 16}$  as a novel regulator of NSCLC cell proliferation and anchorage-independent cell growth. We show that the expression of  $G_{\alpha 16}$  is lost not only in NSCLC cell lines but also in human lung adenocarcinoma and squamous

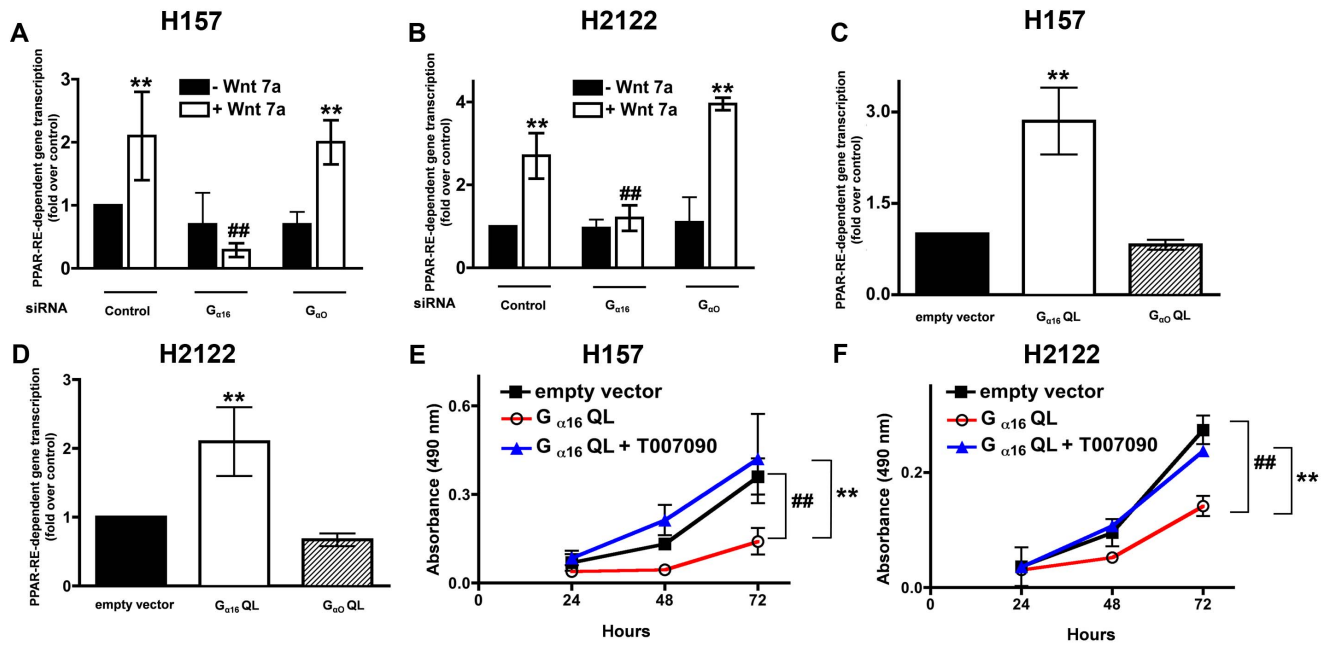

**Figure 5.  $G_{\alpha 16}$  regulates Wnt7a/Fzd9-mediated PPAR $\gamma$  activation.** NSCLC cell lines, H157 (A) or H2122 (B) cells were transfected either with control siRNA or  $G_{\alpha 16}$ -specific siRNAs together with PPAR-RE-luciferase reporter and either without or with Wnt7a expression vector. After 48 h, the lysates were assayed for luciferase activities as described in the Methods. Data represents mean  $\pm$  SEM of three separate experiments. \*\*,  $p < 0.01$ ; versus empty vector control. ##,  $p < 0.01$ ; versus Wnt7a. NSCLC cell lines, H157 (C) or H2122 (D) cells were transfected either with empty vector or constitutively active  $G_{\alpha 16}$  Q212L or  $G_{\alpha 0}$  Q205L expression vectors together with PPAR-RE-luciferase reporter. After 48 h, the lysates were assayed for luciferase activities as described in the Methods. Data represents mean  $\pm$  SEM of three separate experiments. \*\*,  $p < 0.01$ ; versus empty vector control. NSCLC cell lines, H157 (E) or H2122 (F) were transfected with either empty vector or constitutively active  $G_{\alpha 16}$  Q212L. After 24 h, the cells were treated either with or without PPAR $\gamma$  inhibitor (T007090, 10  $\mu$ M) as described in the Methods. Cell proliferation rates were later determined using an MTS assay as described in the Methods. Data represents mean  $\pm$  SEM from three independent highly reproducible experiments. ##,  $p < 0.01$ ; versus empty vector control. \*\*,  $p < 0.01$ ; versus  $G_{\alpha 16}$  Q212L+T007090. doi:10.1371/journal.pone.0076895.g005

carcinoma patients (Fig. 2). Likewise, Wnt7a expression is also lost in lung cancers [6,32,42]. However, it is not known if a synergy exists between loss of  $G_{\alpha 16}$  and other tumor suppressor genes like Wnt7a, P53, and PTEN, and therefore awaits further study. It was shown earlier that  $G_{\alpha 16}$  signaling leads to reduced cell growth in small cell lung cancer (SCLC), which accounts to only 20–25% of primary lung cancers [11]. Similarly, in contrast to NSCLC, growth of small cell lung cancer cells (SCLC) is driven through the establishment of neuropeptide autocrine loops [43]. Numerous studies have shown that the mitogenic signal driven by this autocrine loop is mediated through  $G_{\alpha q}$  [43]. Thus, activation of  $G_{\alpha q}$  plays opposing roles in distinct types of lung cancer, a pro-tumorigenic role in SCLC and potentially an anti-tumorigenic role in NSCLC, via activation of non-canonical Wnt signaling. Thus, use of drugs targeting GPCRs or  $G_{\alpha q}$ -protein family might represent a novel therapeutic strategy in treating specific subtypes of lung cancer.

It is well known that PPAR $\gamma$  receptors are expressed in a variety of tumor cells and activation of PPAR $\gamma$  with ligands leads to either inhibition of cell proliferation or by induction of apoptosis [44]. Furthermore, thiazolidinediones (TZDs), a class of anti-diabetic drugs and synthetic ligands for PPAR $\gamma$ , were also utilized in anti-cancer therapies [45,46]. It was shown that TZDs not only reduced the proliferation rates of A549 cells in *in vitro* cell cultures but also reduced A549-induced tumors in nude mice [47]. In the present study, we also identify  $G_{\alpha 16}$  as a novel regulator of PPAR $\gamma$  (Fig. 1). Therefore, therapeutic interventions to restore the lost functions of  $G_{\alpha 16}$  in lung cancers can complement the TZD-based anti-cancer therapies.

The current study also reveals novel roles for upstream effectors like that of ROR1/2 in Wnt7a/Fzd9 signaling. Our results also hint at how cell signaling networks might be differentially utilizing various co-receptors and/or G-proteins in regulating  $\beta$ -catenin-dependent and  $\beta$ -catenin-independent signaling networks (Fig. 7). In summary, our data reveal a novel connection between Wnt7a/Fzd9 signaling and the G-protein  $G_{\alpha 16}$  and co-receptors ROR1/2 in mediating the stimulation of ERK5-dependent activation of the tumor suppressor gene PPAR $\gamma$ . ERK5 regulates a growing number of nuclear transcription factors that may be associated with tumor growth suppression, thus identification of novel G-protein-mediated activation of ERK5, like that of  $G_{\alpha 16}$ , could be an attractive therapeutic target. Thus, our emerging knowledge of GPCRs and intensive current drug development pipelines, place this family of receptors firmly in the center of attention as potential candidates for future cancer therapies.

## Materials and Methods

### Cell Culture and Inhibitors

A human non-transformed lung epithelial cell line (Beas2B) and NSCLC cell lines (H2122, H157 and H1299) were obtained from ATCC (Manassas, VA, USA). All the cell lines were cultured in RPMI 1640 medium (10-040-CV, Cellgro, Mediatech Inc., Manassas, VA) supplemented with 10% fetal bovine serum (FBS) in a humidified 5% CO $_2$  incubator at 37°C. Stable transfectants of H2122 (H2122-LNCX and H2122- $G_{\alpha 16}$ Q212L) were made using retroviral mediated gene transfer as previously described (Winn et al., 2005; Wick et al., 2002). The cell lines

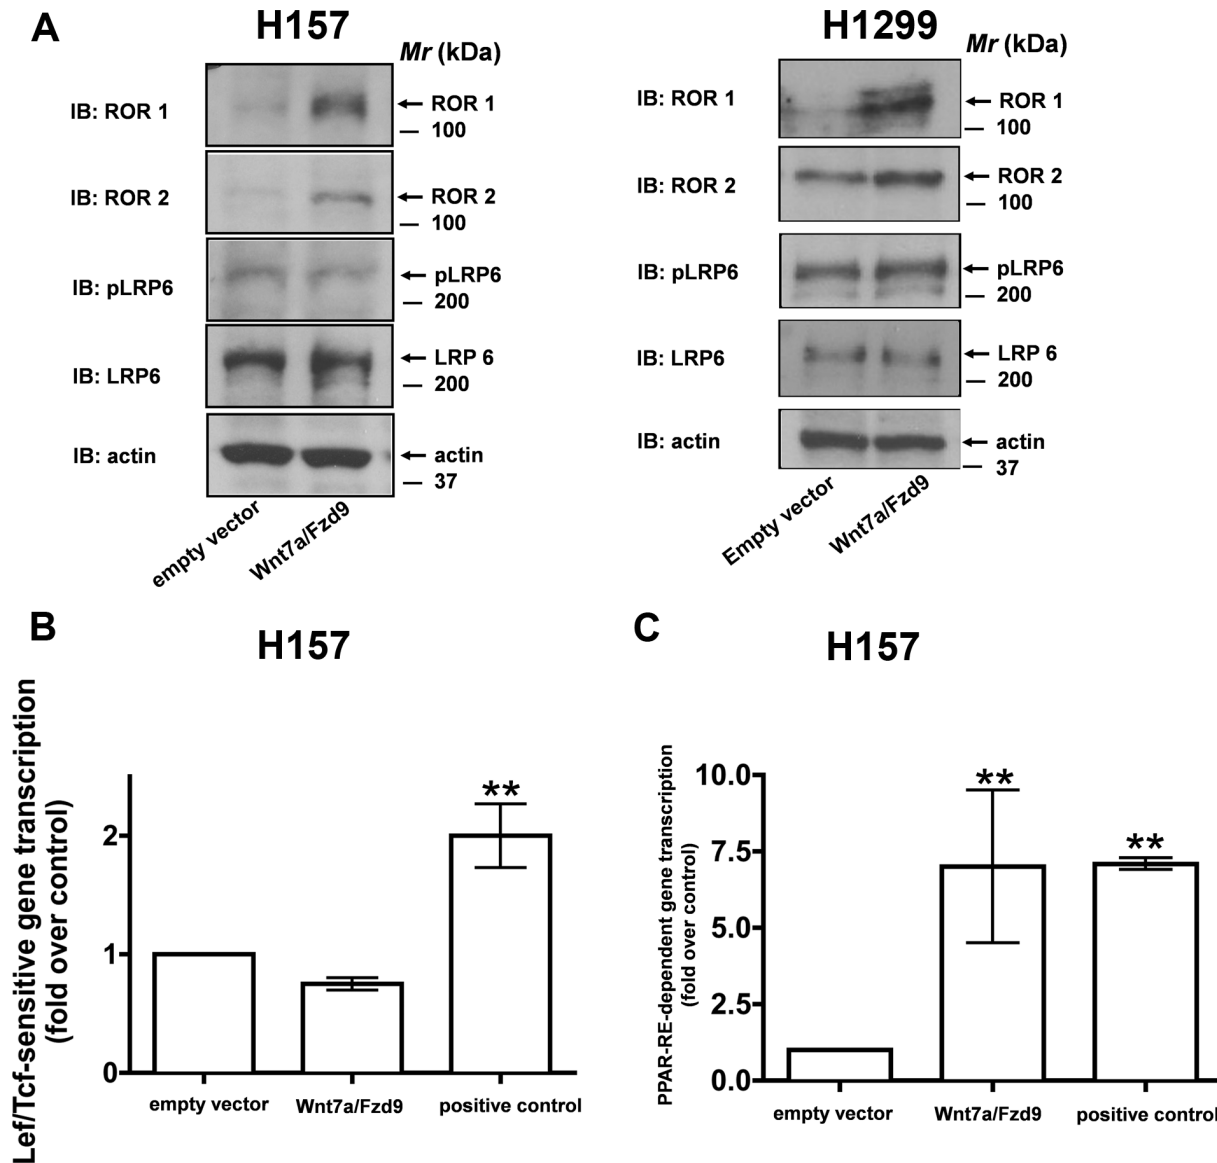

**Figure 6. Wnt7a/Fzd9 signaling regulates ROR1/2 expression.** A, H157 and H1299 cells were either transfected with empty vector or with Wnt7a and Fzd9 expression vectors. After 48 h, the cell lysates were probed for the expression of ROR1, ROR2, pLRP6 ser1490, and LRP6. Equal loading of proteins were ascertained by probing the blots with anti- $\beta$ -actin antibodies. H157 cells were transfected with either empty vector or Wnt7a and Fzd9 expression vectors along with either M50-TOPFLASH luciferase reporter (B) or PPAR-RE-luciferase reporter (C). Positive controls used in M50-TOPFLASH reporter experiments is the  $\beta$ -catenin expression vector and in the case of PPAR-RE-luciferase vector is the PPAR $\gamma$  expression vector. After 48 h, the lysates were assayed for luciferase activities as described in the Methods. Data represents mean  $\pm$  SEM of three separate experiments. \*\*,  $p < 0.01$ ; versus empty vector control. doi:10.1371/journal.pone.0076895.g006

were cultured bi-weekly and stocks of cell lines were passaged no more than ten times for use in experiments. The inhibitors used in our studies include, MEK inhibitors, [PD98059 (Sigma), U0126 (CalBiochem)] and PPAR $\gamma$  antagonist (T0070907, Calbiochem/EMD Biosciences).

#### Cell Proliferation Studies and Anchorage-independent Growth

Clonogenic assays were performed in triplicates by seeding 1000 cells in a well of 12-well culture plate followed by incubation at 37°C in a 5% CO<sub>2</sub> incubator. After 72 h, cell colonies were stained using a staining solution (0.5% of Crystal Violet, 12% Glutaraldehyde, 87.5% of water) for 1 h at room temperature.

After de-staining in water and drying, colonies were quantified using Biorad Chemidoc Imaging System. Cloning efficiency represents the mean number of colonies formed per well.

MTS assays were performed in duplicates by seeding 500 cells in a well of 96-well culture plate, followed by incubation at 37°C in a 5% CO<sub>2</sub> incubator. Cell proliferation was measured after 24, 48 and 72 h by adding 20  $\mu$ l of MTS reagent (Cell Titer 96<sup>®</sup> Aqueous One Solution, G3582, Promega Corporation, Madison, WI) to each well, followed by incubation at 37°C. After 1 h, the absorbance of the formazon product was measured at 490 nm using a plate reader. Normalized absorbance values (sample readings-readings of media only blank) were represented in the graphs.



## $\beta$ -catenin-dependent signaling      $\beta$ -catenin-independent signaling

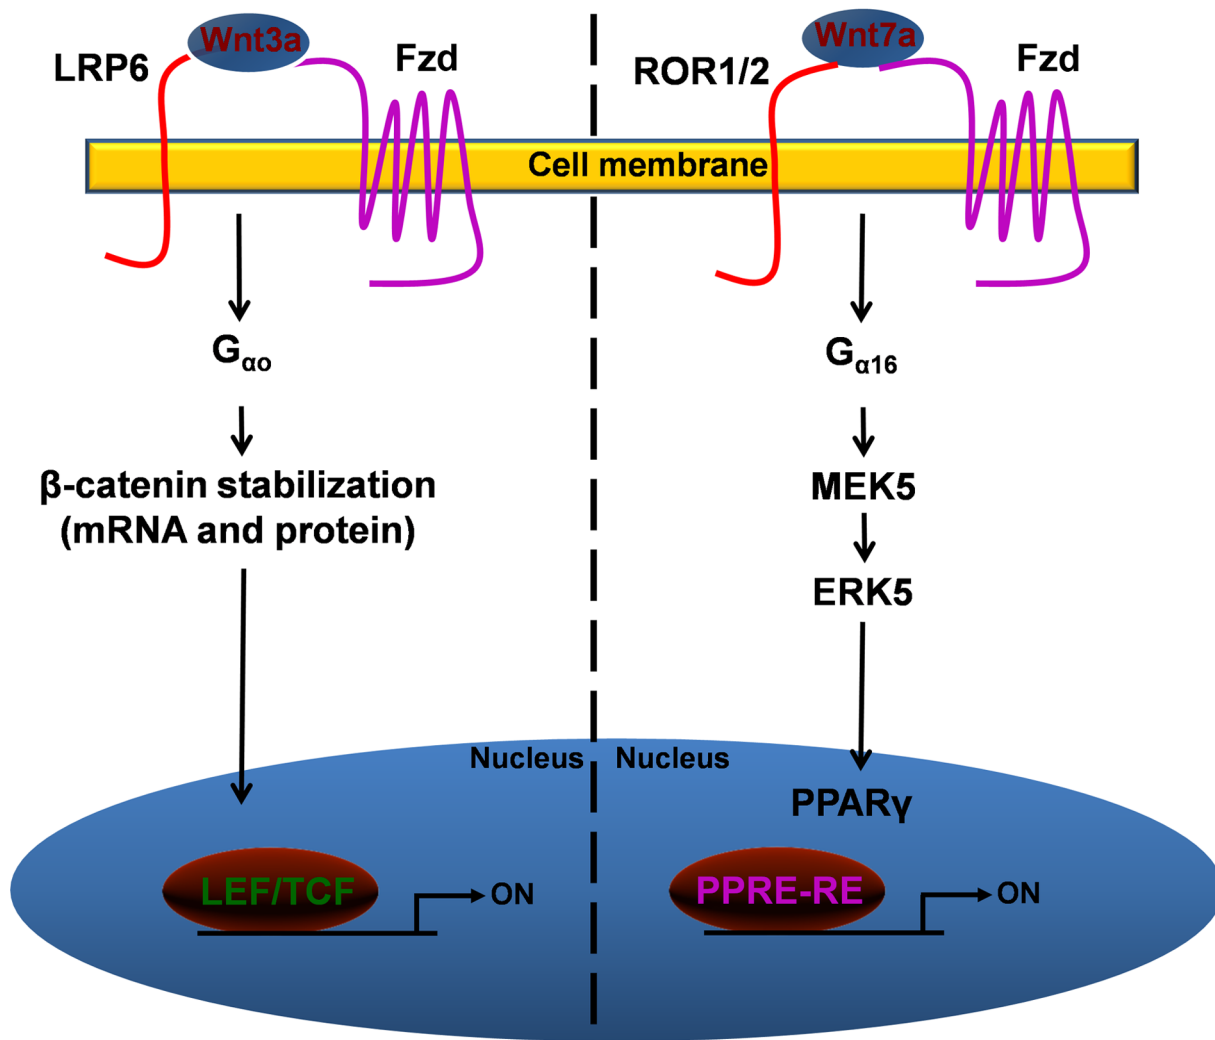

**Figure 7. Schematic representation of differential utilization of co-receptors and G-proteins for  $\beta$ -catenin-dependent and  $\beta$ -catenin-independent signaling pathways.** Based on our current understanding of Wnt-sensitive pathways, we propose that Wnt binding to Fzd and co-receptor LRP5/6, and mediated by  $G_{\alpha o}$ , leads to activation of  $\beta$ -catenin-dependent gene transcription. While, Wnt binding to Fzd and co-receptor ROR1/2, and mediated by  $G_{\alpha 16}$ , leads to the activation of  $\beta$ -catenin-independent signaling pathway, mainly via activation of ERK5 and PPAR $\gamma$ . doi:10.1371/journal.pone.0076895.g007

For measurement of cell growth rates, 50,000 cells in complete growth medium were seeded per well in a 24-well culture plate. On subsequent days, cells were trypsinized from the wells with 100  $\mu$ L of trypsin, diluted with 400  $\mu$ L of growth medium, and counted using a hemocytometer.

For measurement of anchorage-independent cell growth, 5,000 cells were plated in triplicates in 35-mm wells of a six-well plate in a volume of 1.5 ml of growth medium containing 0.3% noble agar onto a base of 1.5 ml of growth medium containing 0.5% agar. The plates were incubated in a 37°C CO<sub>2</sub> incubator for 14 days. Later, colonies were stained for 5–16 h at 37°C with nitroblue tetrazolium chloride (1 mg/ml), visualized under a microscope, and counted.

### Transfections and Luciferase Reporter Assays

The reporter plasmids (PPAR-RE-luciferase reporter, E-cadherin promoter-luciferase-reporter, or MEF2-C-promoter-luciferase

reporter, expression plasmids (pLNCX-Wnt7a-HA and pLPCX-Fzd9) and CMV- $\beta$ -galactosidase control plasmids were transiently transfected into NSCLC cells using LipofectAmine reagent (18324-012, Invitrogen, Carlsbad, CA, USA) as per the manufacturer's recommendations. The MEF2-C-promoter luciferase reporter was a kind gift from Dr. Rebecca Schweppe (University of Colorado), pGL2 basic-Ecad K1 E/E/E-luciferase reporter was a kind gift from Dr. Eric Fearon (University of Michigan), PPAR-RE-Luciferase was a kind gift from Dr. Raphael Nemenoff (University of Colorado), and pMV-7 plasmids encoding constitutively active forms of G-proteins were a kind gift from Dr. Lynn Heasley (University of Colorado). All of the luciferase activities were normalized to CMV- $\beta$  gal activities. The expression plasmid for pLNCX-Wnt7a-HA was a gift from Dr. Jan Kitajewski (Columbia University) and pLNCX-Wnt3 was a gift from Dr. Randall Moon (University of Washington). For studies involving the use of MEK inhibitors PD98059 (20  $\mu$ M, Sigma) or

U0126, (10 μM, Calbiochem/EMD Biosciences, San Diego, CA), H2122 and H157 cells were co-transfected either without or with G<sub>α16</sub>Q212L and MEF2-C-luciferase reporter plasmids followed by treatment with MEK inhibitors. After 24 h, the lysates were assayed for luciferase activities.

### G-protein Knock down Studies

Beas2B cells or NSCLC cells (H157 or H2122) were seeded in a 100 mm dish (2×10<sup>6</sup> cells), followed by incubation for 1 h at 37°C. G-protein specific siRNAs (5 nM) diluted in 1 mL of serum free medium were mixed with 40 μL of Hiperfect Transfection Reagent. After incubation of the siRNA complexes for 5 min at room temperature, the siRNA complexes are added drop-wise onto the cells. The cells were incubated for 48 h and analyzed for G-protein knock down. While, the control siRNAs (Qiagen, all stars negative control, #1027280) and G<sub>αo</sub> specific siRNAs (Qiagen, # SI00128632) were pre-designed, the G<sub>α16</sub>-specific siRNAs were custom synthesized from Qiagen. The sequences of the G<sub>α16</sub>-specific siRNAs are as follows: sense strand-GGUU-CAUCCUGGACAUGUATT and anti-sense strand-UACAU-GUCCAGGAUGAACCTC.

### Immunoblot Analysis

Cell extracts were prepared in a lysis buffer (0.5% Triton X-100, 50 mM β-glycerophosphate, pH 7.20, 0.1 mM sodium vanadate, 2 mM MgCl<sub>2</sub>, 1 mM EGTA, 1 mM dithiothreitol, 2 μg/ml leupeptin, and 4 μg/ml aprotinin) and the western blot analysis was carried out as previously described [26]. The following antibodies were used for immunoblotting: G<sub>αq</sub>, G<sub>αo</sub>,

G<sub>α16</sub> (Santa Cruz), phospho-ERK5 and total ERK5 (Cell Signaling). Aliquots of various NSCLC extracts were resolved on 10% SDS-PAGE gels and transferred to nitrocellulose. The filters were blocked in Tris-buffered saline (10 mM Tris-Cl, pH 7.4, 140 mM NaCl, containing 0.1% Tween 20 (TTBS) and 3% nonfat dry milk and then incubated with the same blocking solution containing the indicated antibodies at 0.5 μg/ml for 12–16 h. For immunoblotting of phospho-ERK-5, filters were blocked in TTBS containing 3% bovine serum albumin. The filters were extensively washed in TTBS, and bound antibodies were visualized with horseradish peroxidase (HRP)-coupled secondary antibodies.

### Data Analysis

Data were compiled from at least three independent, replicate experiments, each performed on separate cultures and on separate occasions. The responses are displayed as “fold-changes”. Comparisons of data among experimental groups were performed using student’s *t*-test for assessing variance. Increase in statistical significance (*p* value of <0.05) is denoted with an “\*” symbol, while a decrease in statistical significance (*p* value of <0.05) is denoted with a “#” symbol.

### Author Contributions

Conceived and designed the experiments: SA RKB JWS MVS RAW. Performed the experiments: SA RKB MVS AL LH JWS JTB. Analyzed the data: SA RKB MVS WZ JWS. Contributed reagents/materials/analysis tools: LEH. Wrote the paper: SA RKB RAW.

### References

- Clevers H, Nusse R (2012) Wnt/beta-catenin signaling and disease. *Cell* 149: 1192–1205.
- Bikkavilli RK, Feigin ME, Malbon CC (2008) G alpha o mediates WNT-JNK signaling through dishevelled 1 and 3, RhoA family members, and MEKK 1 and 4 in mammalian cells. *J Cell Sci* 121: 234–245.
- Bikkavilli RK, Feigin ME, Malbon CC (2008) p38 mitogen-activated protein kinase regulates canonical Wnt-β-catenin signaling by inactivation of GSK3β. *J Cell Sci* 121: 3598–3607.
- Bikkavilli RK, Malbon CC (2009) Mitogen-activated protein kinases and Wnt/β-catenin signaling: Molecular conversations among signaling pathways. *Commun Integr Biol* 2: 46–49.
- Winn RA, Van Scoyk M, Hammond M, Rodriguez K, Crossno JT Jr, et al. (2006) Antitumorogenic effect of Wnt 7a and Fzd 9 in non-small cell lung cancer cells is mediated through ERK-5-dependent activation of peroxisome proliferator-activated receptor gamma. *The Journal of biological chemistry* 281: 26943–26950.
- Winn RA, Marek L, Han SY, Rodriguez K, Rodriguez N, et al. (2005) Restoration of Wnt-7a expression reverses non-small cell lung cancer cellular transformation through frizzled-9-mediated growth inhibition and promotion of cell differentiation. *The Journal of biological chemistry* 280: 19625–19634.
- Angers S, Moon RT (2009) Proximal events in Wnt signal transduction. *Nat Rev Mol Cell Biol* 10: 468–477.
- Peifer M, Polakis P (2000) Wnt signaling in oncogenesis and embryogenesis—a look outside the nucleus. *Science* 287: 1606–1609.
- Fredriksson R, Lagerstrom MC, Lundin LG, Schioth HB (2003) The G-protein-coupled receptors in the human genome form five main families. Phylogenetic analysis, paralogon groups, and fingerprints. *Molecular pharmacology* 63: 1256–1272.
- Pierce KL, Premont RT, Lefkowitz RJ (2002) Seven-transmembrane receptors. *Nat Rev Mol Cell Biol* 3: 639–650.
- Heasley LE, Zamarripa J, Storey B, Helfrich B, Mitchell FM, et al. (1996) Discordant signal transduction and growth inhibition of small cell lung carcinomas induced by expression of GTPase-deficient G alpha 16. *J Biol Chem* 271: 349–354.
- Cuttitta F, Carney DN, Mulshine J, Moody TW, Fedorko J, et al. (1985) Autocrine growth factors in human small cell lung cancer. *Cancer Surv* 4: 707–727.
- Ma L, Wang HY (2006) Suppression of cyclic GMP-dependent protein kinase is essential to the Wnt/cGMP/Ca2+ pathway. *J Biol Chem* 281: 30990–31001.
- Wang H, Lee Y, Malbon CC (2004) PDE6 is an effector for the Wnt/Ca2+/cGMP-signaling pathway in development. *Biochem Soc Trans* 32: 792–796.
- Ahumada A, Slusarski DC, Liu X, Moon RT, Malbon CC, et al. (2002) Signaling of rat Frizzled-2 through phosphodiesterase and cyclic GMP. *Science* 298: 2006–2010.
- Liu T, DeCostanzo AJ, Liu X, Wang H, Hallagan S, et al. (2001) G protein signaling from activated rat frizzled-1 to the beta-catenin-Lef-Tcf pathway. *Science* 292: 1718–1722.
- Liu T, Lee YN, Malbon CC, Wang HY (2002) Activation of the beta-catenin/Lef-Tcf pathway is obligate for formation of primitive endoderm by mouse F9 totipotent teratocarcinoma cells in response to retinoic acid. *J Biol Chem* 277: 30887–30891.
- Katanaev VL, Ponzelli R, Semeriva M, Tomlinson A (2005) Trimeric G protein-dependent frizzled signaling in *Drosophila*. *Cell* 120: 111–122.
- Koval A, Katanaev VL (2011) Wnt3a stimulation elicits G-protein-coupled receptor properties of mammalian Frizzled proteins. *Biochem J* 433: 435–440.
- Winn RA, Marek L, Han SY, Rodriguez K, Rodriguez N, et al. (2005) Restoration of Wnt-7a expression reverses non-small cell lung cancer cellular transformation through frizzled-9-mediated growth inhibition and promotion of cell differentiation. *J Biol Chem* 280: 19625–19634.
- Thiery JP (2002) Epithelial-mesenchymal transitions in tumour progression. *Nat Rev Cancer* 2: 442–454.
- Thiery JP (2003) Epithelial-mesenchymal transitions in development and pathologies. *Curr Opin Cell Biol* 15: 740–746.
- Wick M, Hurteau G, Dessev C, Chan D, Geraci MW, et al. (2002) Peroxisome proliferator-activated receptor-gamma is a target of nonsteroidal anti-inflammatory drugs mediating cyclooxygenase-independent inhibition of lung cancer cell growth. *Molecular pharmacology* 62: 1207–1214.
- Liu T, Liu X, Wang H, Moon RT, Malbon CC (1999) Activation of rat frizzled-1 promotes Wnt signaling and differentiation of mouse F9 teratocarcinoma cells via pathways that require Galpha(q) and Galpha(o) function. *J Biol Chem* 274: 33539–33544.
- Mermel CH, Schumacher SE, Hill B, Meyerson ML, Beroukhim R, et al. (2011) GISTIC2.0 facilitates sensitive and confident localization of the targets of focal somatic copy-number alteration in human cancers. *Genome Biol* 12: R41.
- Bren-Mattison Y, Van Putten V, Chan D, Winn R, Geraci MW, et al. (2005) Peroxisome proliferator-activated receptor-gamma (PPARγ) inhibits tumorigenesis by reversing the undifferentiated phenotype of metastatic non-small-cell lung cancer cells (NSCLC). *Oncogene* 24: 1412–1422.
- Kasler HG, Victoria J, Duramad O, Winoto A (2000) ERK5 is a novel type of mitogen-activated protein kinase containing a transcriptional activation domain. *Mol Cell Biol* 20: 8382–8389.
- Bikkavilli RK, Malbon CC (2012) Wnt3a-stimulated LRP6 phosphorylation is dependent upon arginine methylation of G3BP2. *J Cell Sci* 125: 2446–2456.

29. Tamai K, Zeng X, Liu C, Zhang X, Harada Y, et al. (2004) A mechanism for Wnt coreceptor activation. *Mol Cell* 13: 149–156.
30. Tamai K, Semenov M, Kato Y, Spokony R, Liu C, et al. (2000) LDL-receptor-related proteins in Wnt signal transduction. *Nature* 407: 530–535.
31. Kirikoshi H, Katoh M (2002) Expression of WNT7A in human normal tissues and cancer, and regulation of WNT7A and WNT7B in human cancer. *Int J Oncol* 21: 895–900.
32. Calvo R, West J, Franklin W, Erickson P, Bemis L, et al. (2000) Altered HOX and WNT7A expression in human lung cancer. *Proc Natl Acad Sci U S A* 97: 12776–12781.
33. Malbon CC (2004) Frizzleds: new members of the superfamily of G-protein-coupled receptors. *Front Biosci* 9: 1048–1058.
34. Malbon CC (2005) G proteins in development. *Nat Rev Mol Cell Biol* 6: 689–701.
35. Chen W, ten Berge D, Brown J, Ahn S, Hu LA, et al. (2003) Dishevelled 2 recruits beta-arrestin 2 to mediate Wnt5A-stimulated endocytosis of Frizzled 4. *Science* 301: 1391–1394.
36. Feigin ME, Malbon CC (2007) RGS19 regulates Wnt-beta-catenin signaling through inactivation of Galpha(o). *J Cell Sci* 120: 3404–3414.
37. Fukuhara S, Marinissen MJ, Chiariello M, Gutkind JS (2000) Signaling from G protein-coupled receptors to ERK5/Big MAPK 1 involves Galpha q and Galpha 12/13 families of heterotrimeric G proteins. Evidence for the existence of a novel Ras AND Rho-independent pathway. *J Biol Chem* 275: 21730–21736.
38. Rhee SG (2001) Regulation of phosphoinositide-specific phospholipase C. *Annu Rev Biochem* 70: 281–312.
39. Oliva JL, Caino MC, Senderowicz AM, Kazanietz MG (2008) S-Phase-specific activation of PKC alpha induces senescence in non-small cell lung cancer cells. *J Biol Chem* 283: 5466–5476.
40. Li G, Lucas JJ, Gelfand EW (2005) Protein kinase C alpha, betaI, and betaII isozymes regulate cytokine production in mast cells through MEKK2/ERK5-dependent and -independent pathways. *Cell Immunol* 238: 10–18.
41. Diaz-Meco MT, Moscat J (2001) MEK5, a new target of the atypical protein kinase C isoforms in mitogenic signaling. *Mol Cell Biol* 21: 1218–1227.
42. Tennis MA, Vanscoyk MM, Wilson LA, Kelley N, Winn RA (2012) Methylation of Wnt7a is modulated by DNMT1 and cigarette smoke condensate in non-small cell lung cancer. *PLoS One* 7: e32921.
43. Gudermann T, Roelle S (2006) Calcium-dependent growth regulation of small cell lung cancer cells by neuropeptides. *Endocr Relat Cancer* 13: 1069–1084.
44. Tachibana K, Yamasaki D, Ishimoto K, Doi T (2008) The Role of PPARs in Cancer. *PPAR research* 2008: 102737.
45. Blanquicett C, Roman J, Hart CM (2008) Thiazolidinediones as anti-cancer agents. *Cancer Ther* 6: 25–34.
46. Li MY, Yuan H, Ma LT, Kong AW, Hsin MK, et al. (2010) Roles of peroxisome proliferator-activated receptor-alpha and -gamma in the development of non-small cell lung cancer. *Am J Respir Cell Mol Biol* 43: 674–683.
47. Zhang W, Zhang H, Xing L (2006) Influence of ciglitazone on A549 cells growth in vitro and in vivo and mechanism. *J Huazhong Univ Sci Technolog Med Sci* 26: 36–39.
